# Supplementary material
Source: publisher figshare collection journal article supplement (https://karger.figshare.com/articles/dataset/_/5024462)

**Supplementary Figure 2: Age and Sex-specific annual average incidence for years 1992, 1995, 2000, 2001 & 2004-2014**

Detailed population estimates by ten-year age groups were only available for years 1992, 1995, 2000, 2001 and 2004 until 2014.

Supplementary figure 2 shows the age-specific incidence rate for 10 year age groups averaging between the years for which detailed population age structures were available. Overall, ALS incidence was highest in the 60-69 age group. The figure demonstrates a steady increase in ALS incidence with age, peaking at 60-69 years for total and male incidence. Female incidence instead peaks at 50-59years for females. It is surprising that female incidence was consistently 0 in the 80+ group, for all years. However, looking at all years combined, mean age of onset did not significantly differ between males and females.

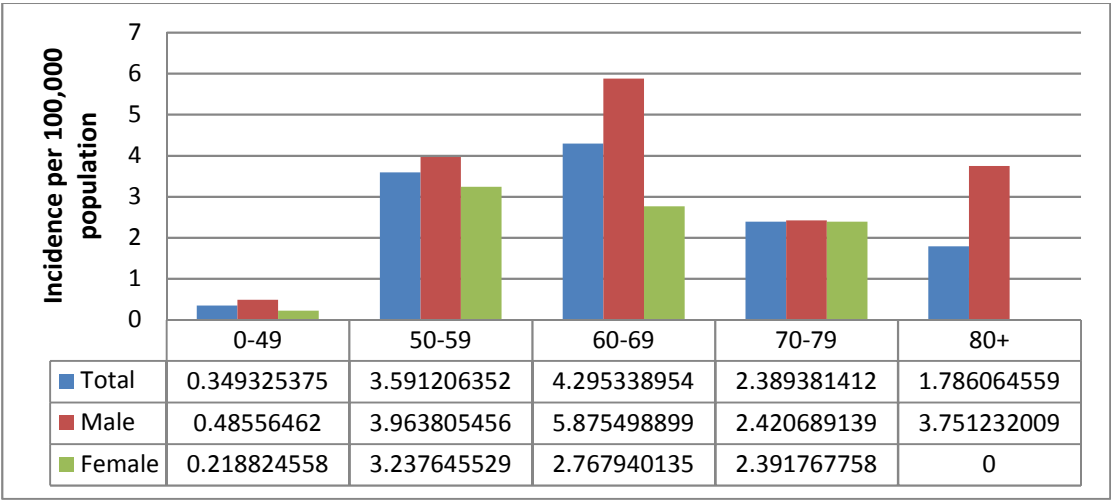

Supplement: Supplementary file 1 [file 1]
