# Supplementary material
Source: publisher figshare collection journal article supplement (https://karger.figshare.com/articles/dataset/_/5024462)
Supplement: Supplementary file 2 [file 1 › 477126_sm1.PDF]

| Year         | New cases by year of diagnosis |           |                |           |
|--------------|--------------------------------|-----------|----------------|-----------|
|              | Males (n=106)                  |           | Females (n=73) |           |
|              | Under 65                       | 65+       | Under 65       | 65+       |
| 1986         | 1                              | 0         | 0              | 1         |
| 1988         | 0                              | 0         | 1              | 0         |
| 1989         | 1                              | 0         | 1              | 0         |
| 1990         | 3                              | 2         | 3              | 2         |
| 1991         | 2                              | 3         | 2              | 0         |
| 1992         | 4                              | 0         | 3              | 0         |
| 1993         | 2                              | 2         | 3              | 0         |
| 1994         | 1                              | 0         | 0              | 1         |
| 1995         | 0                              | 0         | 1              | 0         |
| 1996         | 0                              | 0         | 1              | 0         |
| 1997         | 1                              | 1         | 3              | 1         |
| 1998         | 2                              | 1         | 1              | 3         |
| 1999         | 2                              | 2         | 1              | 0         |
| 2000         | 2                              | 0         | 1              | 1         |
| 2001         | 1                              | 1         | 2              | 1         |
| 2002         | 3                              | 0         | 0              | 2         |
| 2003         | 3                              | 0         | 1              | 1         |
| 2004         | 2                              | 3         | 0              | 2         |
| 2005         | 6                              | 6         | 2              | 0         |
| 2006         | 3                              | 3         | 0              | 2         |
| 2007         | 8                              | 3         | 4              | 1         |
| 2008         | 3                              | 2         | 3              | 2         |
| 2009         | 3                              | 0         | 3              | 0         |
| 2010         | 7                              | 0         | 2              | 2         |
| 2011         | 2                              | 3         | 3              | 0         |
| 2012         | 2                              | 3         | 3              | 0         |
| 2013         | 3                              | 1         | 2              | 0         |
| 2014         | 3                              | 0         | 2              | 3         |
| <b>Total</b> | <b>70</b>                      | <b>36</b> | <b>48</b>      | <b>25</b> |
